# Supplementary material
Source: PubMed Central journal article supplement (PMC3977292)
Supplement: 1400768111_pnas.201400768SI.pdf [file 1400768111_pnas.201400768SI.pdf]

# Supporting Information

Mistry et al. 10.1073/pnas.1400768111

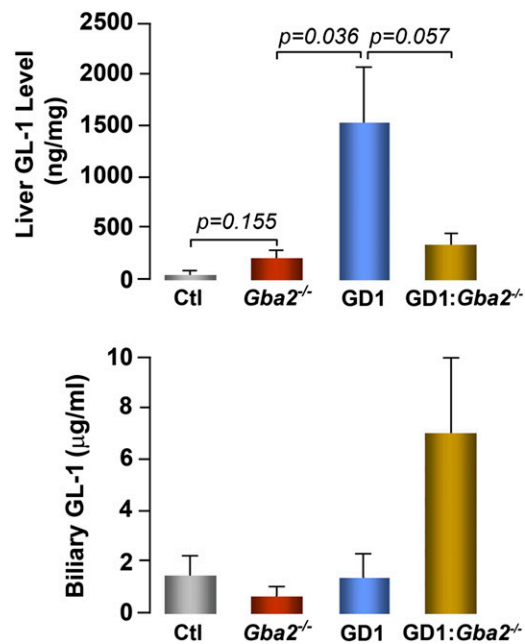

Fig. S1. Glucosylceramide (GL-1) levels measured in the liver and biliary secretions of wild-type (WT;  $n = 5$ ),  $Mx1-Cre^+$ :GD1 (GD1;  $n = 5$ ),  $Gba2^{-/-}$  ( $n = 5$ ), and GD1: $Gba2^{-/-}$  ( $n = 5$ ) mice. GD1, type 1 Gaucher disease.
